# 1 **Cell-cell communication through FGF4 generates and maintains robust** 2 **proportions of differentiated cell fates in embryonic stem cells**

3

4 Dhruv Raina<sup>1</sup>, Angel Stanoev<sup>1</sup>, Azra Bahadori<sup>1,2</sup>, Michelle Protzek<sup>1</sup>, Aneta Koseska<sup>1</sup>,  
5 Christian Schröter<sup>1,\*</sup>

6

7 <sup>1</sup> Department of Systemic Cell Biology, Max Planck Institute of Molecular Physiology,  
8 Dortmund, Germany

9 <sup>2</sup> Current address: Center for Chromosome Stability, University of Copenhagen, Copenhagen,  
10 Denmark

11 \*For correspondence: christian.schroeter@mpi-dortmund.mpg.de

12

## 13 **Abstract**

14 During embryonic development and tissue homeostasis, reproducible proportions of  
15 differentiated cell types need to be specified from homogeneous precursor cell populations.

16 How this is achieved despite uncertainty in initial conditions in the precursor cells, and how  
17 proportions are re-established upon perturbations in the developing tissue is not known. Here

18 we report the differentiation of robust proportions of epiblast- and primitive endoderm-like  
19 cells from a wide range of experimentally controlled initial conditions in mouse embryonic

20 stem cells. We demonstrate both experimentally and theoretically that recursive cell-cell

21 communication via FGF4 establishes a population-based mechanism that generates and

22 maintains robust proportions of differentiated cell types. Furthermore, we show that cell-cell

23 communication re-establishes heterogeneous cell identities following the isolation of one cell

24 type. The generation and maintenance of robust cell fate proportions is a new function for

25 FGF signaling that may extend to other cell fate decisions.

26

## 27 **Introduction**

28 The differentiation of cell types with discrete identities from an equipotent precursor  
29 population is the basis of embryonic development and tissue homeostasis in the adult.  
30 Canalization of development, the tendency of tissues to produce a standard end result despite  
31 developmental noise and to compensate for perturbations (Waddington, 1942), indicates there  
32 are mechanisms to ensure that specialized cell types are differentiated in reproducible  
33 proportions. Current frameworks to conceptualize cell differentiation emphasize the role of  
34 multistable gene regulatory networks in single cells, which establish stable gene expression  
35 states that correspond to precursor and differentiated states (Enver et al., 2009; Huang et al.,  
36 2007). Extracellular signals facilitate the switching from the precursor to a differentiated state  
37 by modulating the attractor landscape of the single cell circuits (Huang et al., 2007; Schröter  
38 et al., 2015). In this single-cell view of cell differentiation, the specific differentiated state  
39 adopted by an individual cell strongly depends on its initial conditions while in the precursor  
40 state. Accordingly, reliable embryonic development and proportioning of differentiated fates  
41 would require appropriately constraining these initial conditions (Briscoe, 2019).

42 Mammalian preimplantation development is a prime example for developmental canalization.  
43 The size of the three lineages trophoectoderm (TE), epiblast (Epi), and primitive endoderm  
44 (PrE) is remarkably constant between mouse preimplantation embryos (Saiz et al., 2016).  
45 Furthermore, mammalian embryos can compensate for splitting, fusing, or the addition of  
46 embryonic stem cells (ESCs), and regulate the proportions of the three lineages such that the  
47 blastocyst is capable of postimplantation development (Bedzhov et al., 2014; Martinez Arias  
48 et al., 2013). The core gene regulatory networks and signals that first segregate the TE from  
49 the inner cell mass (ICM), and then specify embryonic Epi and extraembryonic PrE identities  
50 in undifferentiated ICM cells are well known. ICM cells initially co-express transcriptional  
51 regulators for both the Epi and the PrE lineage, such as GATA6 and NANOG, before  
52 mutually exclusive expression patterns are established (Chazaud et al., 2006; Plusa et al.,

53 2008; Simon et al., 2018). The dynamics of gene expression and fate allocation, together with  
54 extensive analysis of genetic mutants and pharmacologic interventions in the mouse embryo  
55 have led to a model of mutually repressive interactions between Epi- and PrE-specific  
56 transcriptional regulators in individual cells (Bessonard et al., 2014; Chickarmane and  
57 Peterson, 2008). Under the influence of fibroblast growth factor (FGF)/ extracellular  
58 regulated kinase (ERK) signaling, which inhibits Epi-specific genes such as *Nanog* and  
59 promotes the expression of PrE-specific genes, these mutually repressive interactions are  
60 thought to progressively establish the identity of single cells (Bessonard et al., 2014; De  
61 Caluwé et al., 2019; De Mot et al., 2016). The mutual repression model and its regulation by  
62 FGF/ERK signaling has been substantiated by experiments in embryonic stem cells (ESCs),  
63 in which PrE-like differentiation from an ICM-like state generated through induced  
64 expression of GATA6 or GATA4 requires both a threshold level of induced GATA proteins  
65 as well as ERK activity (Schröter et al., 2015). A central prediction from these models for the  
66 differentiation of Epi- and PrE-identities is that the ratio of the two cell types should critically  
67 depend on initial conditions.

68 Here we report the differentiation of robust proportions of Epi- and PrE-like cell types from a  
69 wide range of initial conditions of an induced ICM-like state in ESCs. Through mutant  
70 analysis, we identify recursive cell-cell communication via local FGF4 signaling as a minimal  
71 molecular mechanism for this emergent property of robust fate proportioning. The  
72 experimental observations can be described by a generic dynamical mechanism, an  
73 inhomogeneous steady state (IHSS), in which robust ratios of differentiated cell fates are  
74 generated and maintained on a population level (Stanoev et al., accompanying manuscript).  
75 We experimentally confirm a central prediction of this theory by demonstrating that cell-cell  
76 communication allows populations to re-establish a mixture of Epi- and PrE-like cell  
77 identities from isolated PrE-like cells.

78

79 **Results**

80

81 **Differentiation of robust proportions of Epi- and PrE-like cell types from a wide range**  
82 **of expression levels of lineage-specific transcriptional regulators.**

83

84 To study mechanisms that control proportions of cell types in populations, we used an ESC  
85 system in which cells with Epi- or PrE-like identity differentiate from an ICM-like cell state  
86 that is generated via transient doxycycline-induced expression of GATA factors. We had  
87 previously shown that PrE-like differentiation from this ICM-like state occurs above a  
88 threshold level of GATA expression and ERK signaling (Schröter et al., 2015) (Fig. 1A). To  
89 further test how the ratio of PrE-like and Epi-like cells depends on the initial transcription  
90 factor expression levels in the ICM-like state, we established new inducible GATA4-mCherry  
91 transgenic ESC lines with independent integrations of the inducible transgene. We induced  
92 the transgene while cells were cultured in 2i + LIF medium (Ying et al., 2008), which  
93 prevents any differentiation through the MEK inhibitor PD0325901 (PD03), and then initiated  
94 differentiation by concomitantly removing doxycycline and switching to chemically defined  
95 N2B27 medium lacking PD03. Varying the doxycycline induction time in a selected clonal  
96 line allowed us to titrate expression levels of the inducible GATA4-mCherry protein by more  
97 than 5-fold (Supplementary Fig. 1A), and thereby to start differentiation from a wide range of  
98 NANOG-to-GATA4-mCherry expression ratios (Fig. 1B). After 40 h of differentiation, we  
99 detected both NANOG-expressing Epi-like cells and PrE-like cells expressing the  
100 endogenous GATA6 protein for all GATA4-mCherry induction levels tested (Fig. 1C).  
101 Quantitative immunofluorescence (QIF) revealed that the proportions of both PrE-like  
102 (GATA6+; NANOG) and Epi-like (GATA6-;NANOG+) cell populations fell within a narrow  
103 range for different induction times (Fig. 1C). The Epi-like population comprised between  
104  $44.3 \pm 13.2\%$  (95% confidence interval (CI), N=4 independent experiments) and  $37.5 \pm 7.8\%$

105 of cells for 1 h and 8 h of induction, respectively, while the proportion of PrE-like cells  
106 increased slightly from  $42.1 \pm 11.6\%$  for 1 h induction to  $51.6\% \pm 15.0\%$  for 2 h, and then  
107 plateaued between  $58.2 \pm 12.4\%$  and  $56.0 \pm 9.3\%$  for 4 h and 8 h of induction, respectively  
108 (Fig. 1C). Thus, a wide range of inducible GATA4-mCherry expression levels lead to similar  
109 distributions of differentiated fates. The robust fate proportioning did not reflect pre-specified  
110 fates or a limited differentiation potential of the cells, as supplementation of the medium with  
111 10 ng/ml FGF4 during the differentiation phase strongly increased the proportion of PrE-like  
112 cells at the expense of Epi-like cells compared to differentiation in N2B27 alone  
113 (Supplementary Fig. S1B). We confirmed the observation of robust fate proportioning in four  
114 clonal cell lines with independent integrations of the GATA4-mCherry transgene, which  
115 displayed a more than 8-fold difference in GATA4-mCherry expression levels following 8 h  
116 of doxycycline induction (Supplementary Fig. S2A, B). Despite these differences in initial  
117 conditions, similar proportions of both GATA6-positive and NANOG-positive cells appeared  
118 upon doxycycline removal and differentiation in N2B27 in all clones (Supplementary  
119 Fig. S2C). The fraction of PrE-like cells, for example, ranged from  $40.0 \pm 12.1\%$  to  
120  $53.0 \pm 7.9\%$  for the lowest and highest expressing clone, respectively (Supplementary Fig.  
121 S2D, left). The two lines with intermediate GATA4-mCherry induction levels gave a slightly  
122 higher percentage of PrE-like cells of up to  $65.9 \pm 11.9\%$ . Supplementation of the medium  
123 with 10 ng/ml FGF4 during the differentiation phase strongly increased the proportion of PrE-  
124 like cells also in this case, to a maximum of  $98.8 \pm 2.0\%$  PrE-like cells in the clonal line with  
125 the highest GATA4-mCherry expression levels (Supplementary Fig. S2D, right). These  
126 observations indicate that all cells have PrE-like differentiation potential upon doxycycline-  
127 induced GATA4-mCherry expression, and suggests that the robust proportioning of cell fates  
128 is established at the population level through cell-cell communication.

129

130 **Robust specification of cell fate proportions arises from recursive cell-cell**  
131 **communication via FGF4.**

132 To identify the molecular mechanism that mediates cell fate proportioning, we focused on  
133 *Fgf4*, as it is the main paracrine activator for ERK in ESCs, and FGF/ERK signaling is  
134 required for PrE differentiation both in ESCs and in the embryo (Kang et al., 2012; Krawchuk  
135 et al., 2013; Kunath et al., 2007; Schröter et al., 2015). In an *Fgf4* mutant GATA4-mCherry  
136 inducible cell line, the differentiation of GATA6<sup>+</sup> PrE-like cells was almost completely  
137 abrogated (Fig. 2A, B), in contrast to previous studies in ESCs (Kang et al., 2012; Wamaitha  
138 et al., 2015), but recapitulating the *Fgf4* mutant phenotype in the embryo (Feldman et al.,  
139 1995; Kang et al., 2012; Krawchuk et al., 2013). The differentiation of PrE-like cells could  
140 efficiently be rescued by supplementing the medium with recombinant FGF4 during the  
141 differentiation phase (Fig. 2A, B). The number of PrE-like cells for a given GATA4-mCherry  
142 induction level smoothly increased with FGF4 concentration (Fig. 2B), suggesting that the  
143 robustness of cell fate proportions in wild type cells could be mediated by regulated FGF4  
144 signaling. To directly test this hypothesis, we compared differentiation outcomes in wild type  
145 cells where FGF4 signaling is triggered by endogenous ligands, with that of mutant cells  
146 treated with a constant exogenous dose of FGF4, upon titrating GATA4-mCherry levels by  
147 varying induction time. In contrast to wild type cells, cell fate proportions in *Fgf4* mutant  
148 cells continuously changed with induction times, thus reflecting the changes in initial  
149 conditions (Fig. 2C). The proportion of GATA6<sup>+</sup>;NANOG<sup>-</sup> PrE-like cells for example  
150 increased from  $11.7 \pm 3.8\%$  following 1 h of doxycycline induction to  $33.0 \pm 6.9\%$  for 2 h,  
151  $59.5 \pm 7.6\%$  for 4 h and  $76.8 \pm 6.5\%$  for 8 h of induction in *Fgf4* mutant cells differentiating  
152 in the presence of 10 ng/ml FGF4, whereas in wild type cells, this fraction slightly increased  
153 from  $33.0 \pm 10.4\%$  for 1 h induction to  $47.9 \pm 3.5\%$  for 2 h and then plateaued, reaching a  
154 maximum of  $51.9 \pm 2.0\%$  for 8 h induction (Fig. 2C). Together, these results indicate that  
155 cell-cell communication via endogenous FGF4 signaling is the molecular basis of robust and

156 reliable cell fate proportioning, irrespective of the variance in initial gene expression levels of  
157 the fate specifiers.

158

159 The independence of fate proportions from initial conditions in a communicating cell  
160 population is a central property of an IHSS, a dynamical solution of a network of mutual  
161 repression switches (Stanoev et al., accompanying manuscript). To test whether the IHSS  
162 solution represents a dynamical basis for our experimental observations, we compared a  
163 single-cell model where FGF4 acts as a unidirectional input to each cell operating an  
164 intracellular *Nanog-Gata* toggle switch (Schröter et al., 2015), with a population-based model  
165 in which cells were recursively communicating via FGF4 (Fig. 2D). Motivated by our  
166 observation that differentiation of PrE-like cells is almost completely abrogated in the *Fgf4*  
167 mutants (Fig. 2A), as well as previous work on regulation of *Nanog* by FGF signaling  
168 (Hamilton and Brickman, 2014; Schröter et al., 2015), we assumed that both secreted as well  
169 as recombinant FGF4 ligands quantitatively reduce *Nanog* expression. To establish coupling  
170 between the cells in a population, FGF4 production must be regulated by the intracellular  
171 circuit. While different coupling topologies can establish an IHSS (Stanoev et al.,  
172 accompanying manuscript), for simplicity we focus here on inhibition of *Fgf4* transcription by  
173 GATA factors, and provide further evidence for this topology below. In the mouse embryo,  
174 FGF ligands have a restricted signaling range (Shimokawa et al., 2011). We therefore  
175 implemented short-range communication via FGF4 in our model (methods).

176 For both the single cell as well as the coupled model, we quantified the proportion of  
177 (NANOG+, GATA-) and (NANOG-, GATA+) cells when starting from a broad range of  
178 initial NANOG/GATA expressions. When FGF is considered as a unidirectional input to the  
179 cells, the numerical simulations demonstrated that the fraction of (NANOG-, GATA+) cells  
180 was highly biased by the distribution of initial gene expressions (Fig. 2D, top and middle  
181 rows). In contrast, for the same initial expression distributions, robust proportions between the

182 two cell types were obtained from a model of a cell population (N=10000), coupled by short-  
183 range communication on a 100×100 grid. (Fig. 2D, bottom row). Bifurcation analysis of a  
184 minimal system of N=2 coupled cells with same parameters demonstrated that this system  
185 indeed exhibits an IHSS solution (Supplementary Fig. S3). This parallel between the  
186 theoretical and experimental results thus substantiates the conceptual differences between a  
187 single-cell and a population-based formulation of differentiation in terms of robust Epi/PrE-  
188 like cell fate proportioning, indicating that recursive communication via FGF signaling  
189 uniquely underlies this dynamical feature.

190

### 191 **FGF4 expression is repressed by GATA factors and acts locally**

192 To further characterize the FGF4-mediated communication mechanism underlying the robust  
193 cell type proportioning in populations, we first investigated how *Fgf4* transcription is  
194 regulated. In situ mRNA staining (Choi et al., 2018) for *Fgf4*, *Nanog* and *Gata6* transcripts  
195 along the differentiation time-course showed that *Nanog* and *Fgf4* mRNA were co-expressed  
196 in most cells before induction in 2i medium (Fig. 3A), but became markedly downregulated  
197 after 8 h of GATA4-mCherry induction in 2i, especially in cells that expressed the GATA4-  
198 mCherry transgene most strongly (Fig. 3A). *Fgf4* transcripts could be detected again  
199 following 40 h of differentiation in N2B27, but now their expression was mutually exclusive  
200 with *Gata6* mRNA (Fig. 3A). Cells transferred from 2i to N2B27 for 40 h without  
201 doxycycline-induction stained positive for *Fgf4* mRNA, but *Nanog* mRNA could barely be  
202 detected (Fig. 3A). These *Fgf4* expression dynamics suggest that GATA factors negatively  
203 regulate *Fgf4* transcription, although they do not rule out a positive influence of NANOG on  
204 *Fgf4* expression that has been identified in the embryo (Frankenberg et al., 2011;  
205 Messerschmidt and Kemler, 2010).

206 If cell fate proportioning in wild type cells was based on regulation of *Fgf4* expression by  
207 GATA factors, one would expect a gradual reduction in FGF4 signaling activity with



208 increasing GATA induction levels. To directly test this prediction, we integrated a *Sprouty4*  
209 (*Spry4*) transcriptional reporter construct that we have previously established as a quantitative  
210 readout for long-term FGF4 signaling in ESCs (Morgani et al., 2018) in the inducible cell  
211 lines. We triggered different GATA4-mCherry expression levels by varying doxycycline  
212 induction time, and measured mean reporter expression levels after 24 h of differentiation in  
213 N2B27 medium. At this timepoint, reporter expression is expected to reflect the integrated  
214 FGF signal of the period during which cells transition from the ICM-like state to  
215 differentiated identities. Consistent with our expectation, we found that higher GATA4-  
216 mCherry expression levels induced by longer doxycycline induction times resulted in reduced  
217 mean fluorescence levels of the *Spry4* reporter at the end of the experiment (Fig. 3B). For the  
218 longest induction time, reporter expression levels were reduced to  $57.8 \pm 5.1\%$  compared to  
219 the uninduced control (Fig. 3 B bottom, N = 4 independent experiments). These data support  
220 the idea that FGF4 signaling levels in the cell population are inversely related with GATA  
221 induction levels, as expected for a molecular mechanism that buffers initial conditions to lead  
222 to robust cell fate proportioning.

223 To test coupling range mediated by FGF4, we next sought to identify the spatial extent of  
224 FGF4 signaling in our system. We first tested the role of global communication through FGF4  
225 ligands by comparing differentiation outcomes at different medium-to-cell ratios during the  
226 differentiation step (Fig. 3C). We reasoned that if FGF4 ligands equilibrated in the medium,  
227 larger volumes would effectively reduce FGF4 concentration and thereby reduce the  
228 proportion of FGF-dependent PrE-like cells. In contrast to this expectation, the proportions of  
229 GATA6<sup>+</sup>; NANOG<sup>-</sup> PrE-like cells detected by flow cytometry 40 h after an 8 h doxycycline  
230 pulse slightly increased with media volume, while the proportions of the GATA6<sup>-</sup>; NANOG<sup>+</sup>  
231 Epi-like cells slightly decreased (Fig. 3C). These results indicate that dilution of FGF4 ligands  
232 in the medium does not strongly affect cell fate proportioning, and suggested that local effects  
233 might be more relevant. To test this, we disrupted cell-cell contacts by trypsinizing and re-

234 seeding cells at different densities immediately after doxycycline induction (Fig. 3D). This  
235 treatment strongly reduced the proportion of PrE-like cells compared to the non-trypsinized  
236 control (Fig. 3D). Furthermore, the proportion of PrE-like cells systematically increased with  
237 cell density (Fig. 3D). Together, these data suggest that cell-cell communication via FGF4  
238 occurs locally and is positively influenced by cell-cell contacts, in line with the assumptions  
239 of our model.

240 To directly measure the spatial range of FGF4 signaling in ESC colonies, we seeded isolated  
241 *Fgf4* wild type cells that were labelled by a constitutively expressed dsRed marker onto a  
242 layer of *Fgf4* mutant cells bearing a *Spry4<sup>H2B-Venus</sup>* transcriptional reporter allele for FGF  
243 signaling (Morgani et al., 2018). After 12 h, H2B-Venus was strongly expressed in a halo of  
244 reporter cells immediately surrounding the *Fgf4* wild type cells, but reporter expression  
245 dropped precipitously in cells further away from the signal-emitting cells (Fig. 3E). The  
246 spatial decay of the H2B-Venus signal was well-approximated by an exponential fit with a  
247 decay length of  $\sim 11 \mu\text{m}$  (9.2 - 12.4  $\mu\text{m}$ , 95% confidence interval, Fig. 3F). This is likely an  
248 overestimate of the immediate effective range of paracrine FGF4 signaling, as the  
249 transcriptional reporter integrates signaling activity over long timescales, during which cell  
250 divisions and movement will increase the distance between signal-sending and –receiving  
251 cells. Thus, the range of repressive coupling via FGF4 that drives robust Epi/PrE-like cell fate  
252 proportioning in ESCs is spatially restricted and acts most efficiently at cell-cell contacts.

253

#### 254 **A distribution of cell fates is maintained by intercellular communication**

255 A key property of a population-based mechanism for cell differentiation, such as the IHSS, is  
256 the interdependence of cells with different fates. In numerical simulations, this property of the  
257 IHSS solution manifests in the regeneration of the heterogeneous populations following the  
258 isolation of a single cell type (Stanoev et al., accompanying manuscript). To test whether  
259 different cell identities were likewise re-established through intercellular communication in

260 ESCs, we isolated cells expressing a live reporter for the PrE-like fate, and followed reporter  
261 expression in a cell population in defined medium over time (Fig. 4A).

262 To track PrE-like identity, we used a transcriptional reporter construct for *Gata6* expression in  
263 the background of a GATA4-mCherry inducible cell line (Freyer et al., 2015; Schröter et al.,  
264 2015). To be able to follow both the up- and the downregulation of reporter expression, we  
265 used VNP as a short-lived reporter protein (Abranches et al., 2013; Nagoshi et al., 2004).  
266 *Gata6*:VNP-positive cells sorted 16 h after the end of a doxycycline pulse regenerated a  
267 mixture of VNP-positive and –negative cells within 10 h of culture in N2B27, similar to the  
268 distribution in cell colonies that had not been disrupted and sorted (Fig. 4B, C). In contrast,  
269 VNP expression was maintained in most sorted cells upon supplementation of the medium  
270 with FGF4, while inhibition of FGF/ERK signaling with the MEK inhibitor PD03 completely  
271 abrogated *Gata6*:VNP expression following sorting (Fig. 4B, C). A similar loss of *Gata6*:VNP  
272 expression was observed when *Fgf4* mutant *Gata6*:VNP-positive cells that had been  
273 differentiated in the presence of recombinant FGF4 for 16 h were sorted and seeded in N2B27  
274 (Supplementary Fig. S4). This indicates that ongoing cell-cell communication via the  
275 FGF4/ERK axis organizes the re-establishment of a mixture of cell identities in a population.

276 Following the dynamics of reporter expression over time revealed that in N2B27, *Gata6*:VNP  
277 levels were transiently downregulated before the heterogeneous expression pattern was re-  
278 established (Fig. 4D, Supplementary Movie S1). This was in contrast to reporter expression  
279 dynamics in the presence of PD03, where all cells rapidly downregulated VNP, and also  
280 differed from expression dynamics both in unperturbed colonies as well as in *Gata6*:VNP-  
281 positive cells cultured in the presence of FGF4, where reporter expression remained constant  
282 over time in the majority of cells (Fig. 4D, Supplementary movies S2 – S4). The transient  
283 dynamics of *Gata6* reporter expression in N2B27 were paralleled by characteristic changes in  
284 *Fgf4* expression: While *Fgf4* transcripts could hardly be detected immediately after sorting,  
285 they re-appeared in a fraction of VNP-low cells 6 h later, at around the same time that reporter

286 expression started to increase in a subset of cells (Fig. 4E). Taken together, these results  
287 indicate FGF/ERK signaling re-establishes populations with heterogeneous cell identities  
288 following the isolation of a PrE-like cells. In unperturbed cell colonies, intercellular  
289 communication via FGF/ERK therefore not only generates, but also actively maintains  
290 balanced proportions of cells with heterogeneous identities.

291

## 292 **Discussion**

293 Here we report emergent population-level behaviors in the differentiation of Epi- and PrE-like  
294 cells from an induced ICM-like state in ESCs: Robust proportions of cells with the two  
295 identities are specified from a wide range of initial conditions, and re-established from  
296 isolated PrE-like cells. We demonstrate that these emergent behaviors depend on a short-  
297 range FGF4-signal that couples cell identities across the population. The experimental system  
298 recapitulates the behavior of a general class of dynamical systems that break symmetry,  
299 establish and maintain robust proportions of differentiated cell fates through an IHSS as a  
300 population-based solution (Stanoev et al., accompanying manuscript). Our results suggest a  
301 new function for FGF signaling, which is to generate and maintain cell type diversity in  
302 defined proportions.

303

304 The specification of Epi- and PrE-like identities from an induced ICM-like state in ESCs  
305 displays both molecular and functional parallels to the patterning of the ICM of the mouse  
306 preimplantation embryo. Similar to the situation in the embryo, we find that PrE-like  
307 differentiation is lost in *Fgf4* mutant cells, a phenotype that previous *in vitro* studies missed,  
308 possibly due to permanent high-level expression of exogenous GATA factors (Kang et al.,  
309 2012; Wamaitha et al., 2015). Furthermore, we recapitulate *in vitro* the remarkably constant  
310 proportions of cell types that are also seen in the developing embryo (Saiz et al., 2016).  
311 Similar to the situation in the embryo, cell fates in ESC populations are plastic and can be re-

312 specified upon changing a cell's environment (Grabarek et al., 2012; Martinez Arias et al.,  
313 2013). Thus, the functional behavior of the ESC system mirrors the robust and regulative  
314 development of the mouse preimplantation embryo.

315 Molecularly, recursive communication in ESCs is realized through the regulation of *Fgf4*  
316 expression by transcriptional regulators of cellular identity such as GATA factors and  
317 NANOG, as well as through the dose-dependent response of cells to FGF4 ligand levels. In  
318 the embryo, *Fgf4* expression in single cells correlates with markers of cellular identity from  
319 an early timepoint onwards (Guo et al., 2010; Ohnishi et al., 2014), and depends on the  
320 epiblast-specific transcriptional regulators *Oct4* and *Nanog* (Frankenberg et al., 2011;  
321 Messerschmidt and Kemler, 2010; Nichols et al., 1998). Furthermore, a dose-dependent  
322 increase in the number of PrE-cells has been reported for both *Fgf4* mutant and wild type  
323 embryos treated with increasing concentrations of recombinant FGF4 (Krawchuk et al.,  
324 2013). These parallels between ESCs and the embryo suggest that similar molecular and  
325 dynamical mechanisms underlie cell fate patterning in the two systems. Recent work  
326 employing targeted manipulations to lineage sizes in *Fgf4* wild type and mutant embryos has  
327 likewise led to the conclusion that an FGF4-based population-level mechanism for cell fate  
328 decisions balances lineage size in the embryo (Saiz et al., 2019). In the future, it will be  
329 interesting to investigate whether robust cell fate proportioning through recursive  
330 communication via FGF extends to cell fate decisions beyond those of preimplantation  
331 development.

332

333 In the differentiation paradigm studied here, repressive coupling via FGF4 establishes discrete  
334 cell identities in a population, a function that has classically been associated with Delta-Notch  
335 signaling (Henrique and Schweisguth, 2019; Hori et al., 2013). In an engineered cell system,  
336 communication via Delta-Notch generates population-level behaviors similar to those caused  
337 by FGF4 in differentiating ESCs, such as the spontaneous emergence of discrete fates in

338 stable ratios, the re-establishment of those ratios upon removal of one cell type, and the  
339 dependence of cell fate ratios on cell density or contact (Matsuda et al., 2015). In the case of  
340 the engineered system, repressive coupling is realized through a Notch-responsive artificial  
341 repressor of Delta expression (Matsuda et al., 2015), while in differentiating ESCs, FGF4  
342 signaling likely mediates repressive coupling through its connection to the mutually  
343 repressive transcriptional regulatory programs that specify fates. Thus, when embedded in  
344 appropriate intracellular regulatory circuits, molecularly diverse intercellular communication  
345 systems can yield similar functional outputs.

346

347 A central effect of intercellular communication during the differentiation of Epi- and PrE-like  
348 cells is to establish population level robustness, making the collective differentiation outcome  
349 independent from the distribution of initial conditions in single cells. This is because the  
350 behavior of individual cells in a communicating system is different from that of the cells  
351 under non-communicating conditions. As the population-based behavior cannot directly be  
352 extrapolated from that of single cells, the generation of heterogeneous cell identities within a  
353 population requires a different theoretical treatment. In an accompanying manuscript, a new  
354 generic dynamical mechanism has been identified, an IHSS, that describes how  
355 heterogeneous entities can emerge from a homogenous population in presence of cell-cell  
356 communication (Stanoev et al., accompanying manuscript). The robust generation of specific  
357 cell fate proportions irrespective of initial conditions, and their active maintenance through  
358 intercellular communication that we observe experimentally are two key properties of the  
359 IHSS, suggesting that the IHSS is a likely dynamical mechanism underlying the  
360 differentiation of cells with discrete identities during mammalian preimplantation  
361 development. Current models for the specification of Epi- and PrE-identities in the ICM  
362 likewise consist of cell-intrinsic multistable regulatory networks coupled through cell-cell  
363 communication (Bessonard et al., 2014; De Caluwé et al., 2019; De Mot et al., 2016).

364 Although it is possible that these models also show emergent population-level behavior, this  
365 has not been explored, neither theoretically nor experimentally.

366 The population-level mechanism for cell differentiation that we describe here both generates  
367 and evenly populates discrete cell states. It thus embodies both the tendency of single cells to  
368 differentiate towards well-defined identities, as well as the tendency of tissues, organs and  
369 organisms to develop towards a reproducible and stereotyped appearance, thereby reuniting  
370 two connotations of the term developmental canalization (Ferrell, 2012; Guignard et al.;  
371 Waddington, 1942).

372

373

374 **Methods**

375

376 **Cell lines**

377 Cell lines used in this study were E14tg2a (Hooper et al., 1987) and an *Fgf4* mutant *Spry4<sup>H2B-Venus/+</sup>* line that we have previously described (Morgani et al., 2018). dsRed-labelled cells were  
378 from an E14tg2a-background and kindly supplied by J Nichols. The Gata6:VNP reporter was  
379 established in the background of a line carrying a doxycycline-inducible GATA4-mCherry  
380 transgene in the *Coll1a1* locus as well as a randomly integrated H2B-Cerulean nuclear marker  
381 driven by a CAGS promoter described in (Schröter et al., 2015).

382 E14tg2a-based inducible cell lines were maintained in 2i + LIF medium, which consists of a  
383 N2B27 basal medium supplemented with 3  $\mu$ M CHIR99021 (Tocris), 1 $\mu$ M PD0325901  
384 (SelleckChem) and 10 ng/ml LIF (protein expression facility, MPI Dortmund) on fibronectin-  
385 coated tissue culture plastic. For maintenance of *Fgf4* mutant subclones, we supplemented the  
386 2i + LIF medium with 10% fetal bovine serum (FBS), as *Fgf4* mutant lines showed severely  
387 decreased proliferation upon long-term culture in 2i + LIF alone. FBS was removed at least  
388 one day before the experiment.

389 *Spry4*-reporter cell lines to measure signaling range, as well as *Gata6*-reporter cell lines were  
390 maintained on gelatin coated dishes in GMEM-based medium supplemented with 10% fetal  
391 bovine serum, sodium pyruvate, 50  $\mu$ M  $\beta$ -mercaptoethanol, glutamax, non-essential amino  
392 acids and 10 ng/ml LIF. 1  $\mu$ M PD0325901 was added to the cultures of *Spry4*- and *Gata6*-  
393 reporters three days before the experiment, to downregulate *Spry4* reporter expression, or to  
394 capacitate cells for PrE-like differentiation (Schröter et al., 2015).

395 FGF4 was from Peprotech and supplied in the indicated concentrations, together with 1  $\mu$ g/ml  
396 heparin (Sigma).

398

399



## 400 **Genetic engineering of ESC lines**

401 Doxycycline-inducible *GATA4*-mCherry inducible ES cells were generated by electroporation  
402 of 50.000 E14tg2a ES cells with 4 µg of pPB-TET-*GATA4*-mCherry, 4 µg pCAG-rtTA-Neo,  
403 and 4 µg pCAG-PBase (Wang et al., 2008) followed by G418 selection (400 µg/ml) one day  
404 after transfection. We established more than 10 independent clonal lines and assayed  
405 induction levels and homogeneity by flow cytometry 2 – 8 h after induction of transgene  
406 expression by adding 500 ng/ml doxycycline to the culture medium. Four clones with  
407 homogeneous induction levels were chosen and maintained under G418 selection, to  
408 circumvent silencing of the inducible transgene.

409 Mutagenesis of the *Fgf4* locus was performed as previously described (Morgani et al., 2018).  
410 *Fgf4* loss of function clones were identified by PCR-amplification, cloning and sequencing of  
411 a sequence around the *Fgf4* start codon. We either selected clones with a targeted mutation  
412 delivered by a single-stranded DNA repair template that we have previously shown to disrupt  
413 *Fgf4* function (Morgani et al., 2018), or selected at least two independent clones carrying  
414 indels around the start codon that introduced frameshift as well as nonsense mutations. All  
415 independent clones with random indels showed indistinguishable behavior in the  
416 differentiation assays.

417  
418 The *Gata6* reporter cell line was generated using previously described knock-out first  
419 targeting arms of the EUCOMM project (Skarnes et al., 2011), combined with a VNP reporter  
420 cassette (Nagoshi et al., 2004) and a neomycin resistance gene driven from a human β-actin  
421 promoter. This construct was integrated by homologous recombination into a line carrying a  
422 doxycycline-inducible *GATA4*-mCherry transgene in the *Coll1a1* locus as well as a randomly  
423 integrated H2B-Cerulean nuclear marker driven by a CAGS promoter described in (Schröter  
424 et al., 2015). Clones were screened for correct integration of the reporter construct by long  
425 range PCR spanning the targeting arms.

426 The targeting construct to generate the *Spry4<sup>H2B-Venus</sup>* allele in GATA4-mCherry inducible cell  
427 lines was based on the one used in (Morgani et al., 2018), except that the puromycin  
428 selectable marker was exchanged for a neomycin cassette. The construct was integrated into  
429 ESCs by homologous recombination, and neomycin-resistant clones were expanded and  
430 screened for correct integration of the reporter construct by long range PCR spanning the  
431 targeting arms. All genetically modified lines were karyotyped using standard procedures  
432 (Nagy et al., 2008), and only lines with a median chromosome count of  $n = 40$  were used for  
433 experiments.

434

### 435 **Immunostaining and QIF**

436 Immunostaining of adherent cells was performed as previously described (Schröter et al.,  
437 2015). Antibodies used were anti-NANOG (e-bioscience, eBioMLC-51, 14-5761-80, final  
438 concentration 2.5  $\mu\text{g/ml}$ ), anti-GATA6 (R&D AF1700, final concentration 1  $\mu\text{g/ml}$ ), and anti-  
439 FLAG (Sigma-Aldrich F1804-200, final concentration 1  $\mu\text{g/ml}$ ). Secondary antibodies were  
440 from Invitrogen/LifeTech. Images were acquired using a 63x 1.4 N.A. oil-immersion  
441 objective on a confocal Leica SP8 microscope, with all settings held constant between  
442 replicates. Images were quantified using custom scripts written for ImageJ (NIH) and in  
443 Matlab (The Mathworks).

444

### 445 **In situ HCR**

446 Probe sets for *Nanog*, *Gata6* and *Fgf4* and corresponding Alexafluor-labelled amplifiers for  
447 staining of mRNA molecules via third generation in situ HCR (Choi et al., 2018) were  
448 sourced from Molecular Instruments. Staining was performed according to manufacturer's  
449 instructions. Briefly, adherent cells were fixed for 15 minutes with 4% paraformaldehyde,  
450 washed with PBS and permeabilized for several hours in 70% ethanol at  $-20^{\circ}\text{C}$ . Cells were  
451 then washed twice with 2x SSC and equilibrated in probe hybridization buffer for at least 30

452 minutes. Transcript-specific probes were used at a concentration of 4 nM and hybridized  
453 overnight. Excess probe was removed through several washes with probe wash buffer and 5x  
454 SSCT, and cells were equilibrated in amplification buffer for at least 30 minutes.  
455 Fluorescently labeled amplifiers were used at a concentration of 60 nM. Amplification was  
456 allowed to proceed for 16 – 24 hours at room temperature. Excess amplifier was removed by  
457 several washes with 5x SSCT, followed by counterstaining with Hoechst 33342 and mounting  
458 in glycerol-based medium. Imaging was performed on an SP8 confocal microscope with a  
459 63x (NA1.4) lens.

460

#### 461 **Flow cytometry**

462 Staining for flow cytometric analysis of intracellular antigens was performed as previously  
463 described (Schröter et al., 2015). Primary and secondary antibodies were the same as used for  
464 immunostaining. mCherry fluorescence measurements and cell sorting were performed on a  
465 BD FACS Aria. All other flow cytometric analysis was carried out using a BD LSR II. Single  
466 cell events were gated based on forward and side scatter properties. Gates to separate marker-  
467 positive from marker-negative cells were determined visually as the threshold that best  
468 bisected the bimodal distribution of marker expression across all samples within one  
469 experiment.

470

#### 471 **Decay length measurements**

472 *Fgf4* mutant *Spry4:H2B-reporter* cells (Morgani et al., 2018) were seeded at a density of  
473  $5 \times 10^4$  cells/cm<sup>2</sup> in N2B27. 2 hours later, dsRed-expressing cells were added at a density of  
474 500 cells/cm<sup>2</sup>. For the first 3 hours of co-culture, the medium was supplemented with 250 to  
475 500 nM siR-Hoechst (Lukinavičius et al., 2015) to label nuclei. 12 h later, live cells were  
476 imaged on a Leica SP8 confocal system. Nuclei were segmented in FIJI (Schindelin et al.,  
477 2012), and for each *Spry4<sup>H2B-Venus</sup>* cell in the vicinity of a ds-Red expressing cell, the

478 background-subtracted Venus fluorescence intensity as well as the distance to the center of  
479 mass of the dsRed expressing cells was determined. Cells were grouped according to their  
480 distance from dsRed expressing cells in 3  $\mu\text{m}$  bins, and mean fluorescence intensities for each  
481 bin plotted versus their distance. Decay length was estimated in GraphPad Prism by fitting a  
482 plateau followed by a one-phase decay function.

483

#### 484 **Live cell imaging and tracking**

485 To track *Gata6* reporter expression in live cells, PrE-like differentiation was induced by a 6 h  
486 pulse of doxycycline-treatment in serum-containing medium as described in (Schröter et al.,  
487 2015). 16 hours after doxycycline-removal, cells were either switched directly to N2B27  
488 medium lacking phenol red, or trypsinized, sorted for reporter expression, and seeded on  
489 fibronectin-coated imaging dishes (ibidi  $\mu$ -slides). Time-lapse imaging was started within 2 h  
490 after sorting on an Olympus IX81 widefield microscope equipped with LED illumination  
491 (pE4000, CoolLED) and a Hamamatsu c9100-13 EMCCD camera. Hardware was controlled  
492 by MicroManager software (Edelstein et al., 2001). Time-lapse movies were acquired using a  
493 40x oil immersion lens (NA 1.2), with 10-minute time intervals.

494 Cell tracking was carried out with TrackMate (Tinevez et al., 2017) based on the  
495 constitutively expressed H2B-Cerulean nuclear marker. Fluorescence intensity was measured  
496 in a circular region of interest in the center of the nucleus, and background-subtracted  
497 fluorescence intensities plotted in Python. Trace color in Fig. 4D was assigned according to  
498 fluorescence intensity in the last frame of the movie, with respect to the approximated  
499 intensity threshold used for flow sorting (dashed line).

500

501

502

503

## 504 Computational model for cell fate proportioning

505 The model of the intercellular communication system (Fig. 2D) is adapted from an  
506 accompanying manuscript by Stanoev et al., and is described with the following set of  
507 equations:

$$508 \quad \frac{1}{\lambda} \frac{dN_i}{dt} = \alpha_N \frac{1}{1 + G_i^\beta} + \alpha_{N,F} \frac{1}{1 + F_{ext,i}^\eta} - N_i$$

$$509 \quad \frac{1}{\lambda} \frac{dG_i}{dt} = \alpha_G \frac{1}{1 + N_i^\gamma} - G_i$$

$$510 \quad \frac{1}{\lambda} \frac{dF_i}{dt} = \alpha_F \frac{1}{1 + G_i^\delta} - F_i$$

511  $N_i$  and  $G_i$  describe NANOG and GATA6 protein expression levels in cell  $i$ , regulated by  
512 mutual inhibition, while  $F_i$  is the secreted FGF4 whose production is downregulated by  
513 GATA6.  $F_{ext,i} = \frac{1}{|N(i)|+1} \sum_{j \in (N(i) \cup i)} F_j$  is the extracellular FGF4 concentration that is sensed  
514 by cell  $i$  from its neighborhood  $N(i)$ , resulting in downregulation of NANOG production in  
515 the cell.  $\alpha_N = 2.5, \alpha_{N,F} = 0.5, \alpha_G = 3$  and  $\alpha_F = 3$  denote production rate constants,  $\beta = \eta =$   
516  $\gamma = \delta = 2$  are the Hill coefficients, degradation rates were set to 1 as  $\lambda = 50$  was used as a  
517 scaling kinetic parameter. 10000 cells were deployed on a regular 100x100 two-dimensional  
518 lattice with no-flux boundary conditions. Cell-cell communication was modeled to be short-  
519 range, reflecting the experimental wild-type case, i.e. communication between direct  
520 neighbors and cells on two hops away on the lattice, as described in (Stanoev et al.,  
521 accompanying manuscript). When mimicking the *Fgf4* mutant case, communication between  
522 cells was excluded, and an external input was modeled with  $F_{ext} = 1.2$ .

523 The cell populations were initiated analogous to the experimental case (Fig. 2C), by varying  
524 the initial conditions of all cells from being NANOG-expressing, through intermediate  
525 NANOG and GATA6 expression, to being GATA6-expressing. More specifically, the  
526 variables were sampled independently from unimodal Gaussian distributions

527  $\mathcal{N}(\mu_{ics}(p), \sigma_{ics} = 0.1 * \mu_{ics}(p))$ , with the mean  $\mu_{ics}(p) = (1 - p) * \mu_{G-;N+} + p * \mu_{G+;N-}$   
528 placed on the line segment connecting the GATA6-; NANOG+ state  $\mu_{G-;N+}$  and the  
529 GATA6+; NANOG- state  $\mu_{G+;N-}$ , partitioning it in proportion  $p$ .  $p \in \{0, 0.4, 0.5, 0.6, 1\}$  was  
530 used for the quantifications in Fig. 2D, right. Samples from around the endpoints and the  
531 midpoint ( $p \in \{0, 0.5, 1\} \Rightarrow \mu_{ics} \in \{\mu_{G-;N+}, \frac{1}{2}(\mu_{G-;N+} + \mu_{G+;N-}), \mu_{G+;N-}\}$ ) are shown in Fig.  
532 2D, top row.

533 Cell heterogeneity was introduced by varying all of the parameters independently with  
534 standard deviation of 0.02 from the respective values for each cell. Stochastic differential  
535 equation model was constructed from the deterministic equations by adding a multiplicative  
536 noise term  $\sigma X dW_t$ , where  $dW_t$  is the Brownian motion term,  $X$  is the variable state and  $\sigma =$   
537 0.1 is the noise term. The model was solved with  $\Delta t = 0.01$  using the Milstein method  
538 (Milshtein, 1974). Following integration, cell identities were estimated by comparing the  
539 NANOG and GATA6 values from the final states of the cells, and the ratios were computed.

540

#### 541 **Acknowledgements**

542 We thank J. Nichols for sharing dsRed-labelled ESCs, L. Süther for help with generating  
543 inducible cell lines, M. Schulz and S. Müller for assistance with microscopy and flow  
544 cytometry, and P. Bastiaens for stimulating discussion and conceptual input on the project.  
545 We thank P. Bieling and the members of the Schröter and Koseska groups for discussions and  
546 comments on the manuscript. All authors are supported by the Max Planck Society

547

#### 548 **Author contributions**

549 Dhruv Raina, Investigation, Validation, Visualization, Formal analysis, Writing – review &  
550 editing

551 Angel Stanoev, Methodology, Writing – review & editing;

552 Azra Bahadori, Investigation, Visualization, Writing – review & editing;  
553 Michelle Protzek, Investigation, Validation; Writing – review & editing  
554 Aneta Koseska, Conceptualization, Supervision, Writing – review & editing  
555 Christian Schröter, Conceptualization, Methodology, Investigation, Writing – original draft,  
556 Writing – review & editing, Supervision, Project administration;

557

## 558 **References**

559

560 Abranches, E., Bekman, E., and Henrique, D. (2013). Generation and Characterization of a  
561 Novel Mouse Embryonic Stem Cell Line with a Dynamic Reporter of Nanog Expression.  
562 PLoS ONE 8, e59928.

563 Bedzhov, I., Graham, S.J.L., Leung, C.Y., and Zernicka-Goetz, M. (2014). Developmental  
564 plasticity, cell fate specification and morphogenesis in the early mouse embryo. Philos Trans  
565 R Soc Lond, B, Biol Sci 369, 20130538.

566 Bessonnard, S., De Mot, L., Gonze, D., Barriol, M., Dennis, C., Goldbeter, A., Dupont, G.,  
567 and Chazaud, C. (2014). Gata6, Nanog and Erk signaling control cell fate in the inner cell  
568 mass through a tristable regulatory network. Development 141, 3637–3648.

569 Briscoe, J. (2019). Understanding Pattern Formation in Embryos: Experiment, Theory, and  
570 Simulation. Journal of Computational Biology 26, 696–702.

571 Chazaud, C., Yamanaka, Y., Pawson, T., and Rossant, J. (2006). Early lineage segregation  
572 between epiblast and primitive endoderm in mouse blastocysts through the Grb2-MAPK  
573 pathway. Dev Cell 10, 615–624.

574 Chickarmane, V., and Peterson, C. (2008). A Computational Model for Understanding Stem  
575 Cell, Trophoctoderm and Endoderm Lineage Determination. PLoS ONE 3, e3478–e3478.

576 Choi, H.M.T., Schwarzkopf, M., Fornace, M.E., Acharya, A., Artavanis, G., Stegmaier, J.,  
577 Cunha, A., and Pierce, N.A. (2018). Third-generation in situ hybridization chain reaction:  
578 multiplexed, quantitative, sensitive, versatile, robust. Development 145, dev165753–122.

579 De Caluwé, J., Tosenberger, A., Gonze, D., and Dupont, G. (2019). Signalling-modulated  
580 gene regulatory networks in early mammalian development. J Theor Biol 463, 56–66.

581 De Mot, L., Gonze, D., Bessonnard, S., Chazaud, C., Goldbeter, A., and Dupont, G. (2016).  
582 Cell Fate Specification Based on Tristability in the Inner Cell Mass of Mouse Blastocysts.  
583 Biophysj 110, 710–722.

584 Edelstein, A., Amodaj, N., Hoover, K., Vale, R., and Stuurman, N. (2001). Computer Control  
585 of Microscopes Using  $\mu$ Manager (Hoboken, NJ, USA: John Wiley & Sons, Inc.).

586 Enver, T., Pera, M., Peterson, C., and Andrews, P.W. (2009). Stem cell states, fates, and the

- 587 rules of attraction. *Cell Stem Cell* 4, 387–397.
- 588 Feldman, B., Poueymirou, W., Papaioannou, V.E., DeChiara, T.M., and Goldfarb, M. (1995).  
589 Requirement of FGF-4 for postimplantation mouse development. *Science* 267, 246–249.
- 590 Ferrell, J.E., Jr (2012). Bistability, Bifurcations, and Waddington's Epigenetic Landscape.  
591 *Current Biology* 22, R458–R466.
- 592 Frankenberg, S., Gerbe, F., Bessonard, S., Belville, C., Pouchin, P., Bardot, O., and  
593 Chazaud, C. (2011). Primitive endoderm differentiates via a three-step mechanism involving  
594 Nanog and RTK signaling. *Dev Cell* 21, 1005–1013.
- 595 Freyer, L., Schröter, C., Saiz, N., Schrode, N., Nowotschin, S., Martinez Arias, A., and  
596 Hadjantonakis, A.-K. (2015). A loss-of-function and H2B-Venus transcriptional reporter  
597 allele for Gata6 in mice. *BMC Dev Biol* 15, 38.
- 598 Grabarek, J.B., Zyzynska, K., Saiz, N., Piliszek, A., Frankenberg, S., Nichols, J.,  
599 Hadjantonakis, A.-K., and Plusa, B. (2012). Differential plasticity of epiblast and primitive  
600 endoderm precursors within the ICM of the early mouse embryo. *Development* 139, 129–139.
- 601 Guignard, L., Fiuza, U.-M., Leggio, B., Faure, E., Laussu, J., Hufnagel, L., Malandain, G.,  
602 Godin, C., and Lemaire, P. (2017). Contact-dependent cell-cell communications drive  
603 morphological invariance during ascidian embryogenesis. bioRxiv, doi: 10.1101/238741.
- 604 Guo, G., Huss, M., Tong, G.Q., Wang, C., Li Sun, L., Clarke, N.D., and Robson, P. (2010).  
605 Resolution of cell fate decisions revealed by single-cell gene expression analysis from zygote  
606 to blastocyst. *Dev Cell* 18, 675–685.
- 607 Hamilton, W.B., and Brickman, J.M. (2014). Erk Signaling Suppresses Embryonic Stem Cell  
608 Self-Renewal to Specify Endoderm. *CellReports* 1–16.
- 609 Henrique, D., and Schweisguth, F. (2019). Mechanisms of Notch signaling: a simple logic  
610 deployed in time and space. *Development* 146, dev172148–11.
- 611 Hooper, M., Hardy, K., Handyside, A., Hunter, S., and Monk, M. (1987). HPRT-deficient  
612 (Lesch[ndash]Nyhan) mouse embryos derived from germline colonization by cultured cells.  
613 *Nature* 326, 292–295.
- 614 Hori, K., Sen, A., and Artavanis-Tsakonas, S. (2013). Notch signaling at a glance. *Journal of*  
615 *Cell Science* 126, 2135–2140.
- 616 Huang, S., Guo, Y.-P., May, G., and Enver, T. (2007). Bifurcation dynamics in lineage-  
617 commitment in bipotent progenitor cells. *Dev Biol* 305, 695–713.
- 618 Kang, M., Piliszek, A., Artus, J., and Hadjantonakis, A.K. (2012). FGF4 is required for  
619 lineage restriction and salt-and-pepper distribution of primitive endoderm factors but not their  
620 initial expression in the mouse. *Development* 140, 267–279.
- 621 Krawchuk, D., Honma-Yamanaka, N., Anani, S., and Yamanaka, Y. (2013). FGF4 is a  
622 limiting factor controlling the proportions of primitive endoderm and epiblast in the ICM of  
623 the mouse blastocyst. *Dev Biol* 384, 65–71.
- 624 Kunath, T., Saba-El-Leil, M.K., Almousaillekh, M., Wray, J., Meloche, S., and Smith, A.



- 625 (2007). FGF stimulation of the Erk1/2 signalling cascade triggers transition of pluripotent  
626 embryonic stem cells from self-renewal to lineage commitment. *Development* *134*, 2895–  
627 2902.
- 628 Lukinavičius, G., Blaukopf, C., Pershagen, E., Schena, A., Reymond, L., Derivery, E.,  
629 González-Gaitán, M., D'Este, E., Hell, S.W., Gerlich, D.W., et al. (2015). SiR-Hoechst is a  
630 far-red DNA stain for live-cell nanoscopy. *Nature Communications* *6*, 8497.
- 631 Martinez Arias, A., Nichols, J., and Schröter, C. (2013). A molecular basis for developmental  
632 plasticity in early mammalian embryos. *Development* *140*, 3499–3510.
- 633 Matsuda, M., Koga, M., Woltjen, K., Nishida, E., and Ebisuya, M. (2015). Synthetic lateral  
634 inhibition governs cell-type bifurcation with robust ratios. *Nature Communications* *6*, 6195.
- 635 Messerschmidt, D.M., and Kemler, R. (2010). Nanog is required for primitive endoderm  
636 formation through a non-cell autonomous mechanism. *Dev Biol* *344*, 129–137.
- 637 Morgani, S.M., Saiz, N., Garg, V., Raina, D., Simon, C.S., Kang, M., Arias, A.M., Nichols,  
638 J.N., Schröter, C., and Hadjantonakis, A.-K. (2018). A Sprout4 reporter to monitor  
639 FGF/ERK signaling activity in ESCs and mice. *Dev Biol* *441*, 104–126.
- 640 Nagoshi, E., Saini, C., Bauer, C., Laroche, T., Naef, F., and Schibler, U. (2004). Circadian  
641 gene expression in individual fibroblasts: cell-autonomous and self-sustained oscillators pass  
642 time to daughter cells. *Cell* *119*, 693–705.
- 643 Nagy, A., Gertsenstein, M., Vintersten, K., and Behringer, R. (2008). Karyotyping mouse  
644 cells. *CSH Protoc* *2008*, pdb.prot4706–pdb.prot4706.
- 645 Nichols, J., Zevnik, B., Anastassiadis, K., Niwa, H., Klewe-Nebenius, D., Chambers, I.,  
646 Schöler, H., and Smith, A. (1998). Formation of pluripotent stem cells in the mammalian  
647 embryo depends on the POU transcription factor Oct4. *Cell* *95*, 379–391.
- 648 Ohnishi, Y., Huber, W., Tsumura, A., Kang, M., Xenopoulos, P., Kurimoto, K., Oleś, A.K.,  
649 Araúzo-Bravo, M.J., Saitou, M., Hadjantonakis, A.-K., et al. (2014). Cell-to-cell expression  
650 variability followed by signal reinforcement progressively segregates early mouse lineages.  
651 *Nature Cell Biology* *16*, 27–37.
- 652 Plusa, B., Piliszek, A., Frankenberg, S., Artus, J., and Hadjantonakis, A.-K. (2008). Distinct  
653 sequential cell behaviours direct primitive endoderm formation in the mouse blastocyst.  
654 *Development* *135*, 3081–3091.
- 655 Saiz, N., Mora-Bitria, L., Rahman, S., George, H., Herder, J.P., Garcia-Ojalvo, J., and  
656 Hadjantonakis, A.-K. (2019). Growth factor-mediated coupling between lineage size and cell  
657 fate choice underlies robustness of mammalian development. *bioRxiv*.  
658 doi:10.1101/2019.12.27.889006
- 659 Saiz, N., Williams, K.M., Seshan, V.E., and Hadjantonakis, A.-K. (2016). Asynchronous fate  
660 decisions by single cells collectively ensure consistent lineage composition in the mouse  
661 blastocyst. *Nature Communications* *7*, 13463.
- 662 Schindelin, J., Arganda-Carreras, I., Frise, E., Kaynig, V., Longair, M., Pietzsch, T.,  
663 Preibisch, S., Rueden, C., Saalfeld, S., Schmid, B., et al. (2012). Fiji: an open-source platform  
664 for biological-image analysis. *Nat Methods* *9*, 676–682.

- 665 Schröter, C., Rué, P., Mackenzie, J.P., and Martinez Arias, A. (2015). FGF/MAPK signaling  
666 sets the switching threshold of a bistable circuit controlling cell fate decisions in embryonic  
667 stem cells. *Development* *142*, 4205–4216.
- 668 Shimokawa, K., Kimura-Yoshida, C., Nagai, N., Mukai, K., Matsubara, K., Watanabe, H.,  
669 Matsuda, Y., Mochida, K., and Matsuo, I. (2011). Cell surface heparan sulfate chains regulate  
670 local reception of FGF signaling in the mouse embryo. *Dev Cell* *21*, 257–272.
- 671 Simon, C.S., Hadjantonakis, A.-K., and Schröter, C. (2018). Making lineage decisions with  
672 biological noise: Lessons from the early mouse embryo. *WIREs Dev Biol* *61*, e319–16.
- 673 Skarnes, W.C., Rosen, B., West, A.P., Koutsourakis, M., Bushell, W., Iyer, V., Mujica, A.O.,  
674 Thomas, M., Harrow, J., Cox, T., et al. (2011). A conditional knockout resource for the  
675 genome-wide study of mouse gene function. *Nature* *474*, 337–342.
- 676 Tinevez, J.-Y., Perry, N., Schindelin, J., Hoopes, G.M., Reynolds, G.D., Laplantine, E.,  
677 Bednarek, S.Y., Shorte, S.L., and Eliceiri, K.W. (2017). TrackMate: An open and extensible  
678 platform for single-particle tracking. *Methods* *115*, 80–90.
- 679 Waddington, C.H. (1942). Canalization of development and the inheritance of acquired  
680 characters. *Nature* *150*, 563–565.
- 681 Wamaitha, S.E., del Valle, I., Cho, L.T.Y., Wei, Y., Fogarty, N.M.E., Blakeley, P., Sherwood,  
682 R.I., Ji, H., and Niakan, K.K. (2015). *Gata6* potently initiates reprogramming of pluripotent and  
683 differentiated cells to extraembryonic endoderm stem cells. *Genes Dev* *29*, 1239–1255.
- 684 Wang, W., Lin, C., Lu, D., Ning, Z., Cox, T., Melvin, D., Wang, X., Bradley, A., and Liu, P.  
685 (2008). Chromosomal transposition of PiggyBac in mouse embryonic stem cells. *Proceedings*  
686 *of the National Academy of Sciences* *105*, 9290–9295.
- 687 Ying, Q.-L., Wray, J., Nichols, J., Batlle-Morera, L., Doble, B., Woodgett, J., Cohen, P., and  
688 Smith, A. (2008). The ground state of embryonic stem cell self-renewal. *Nature* *453*, 519–  
689 523.
- 690
- 691

692 **Figures**

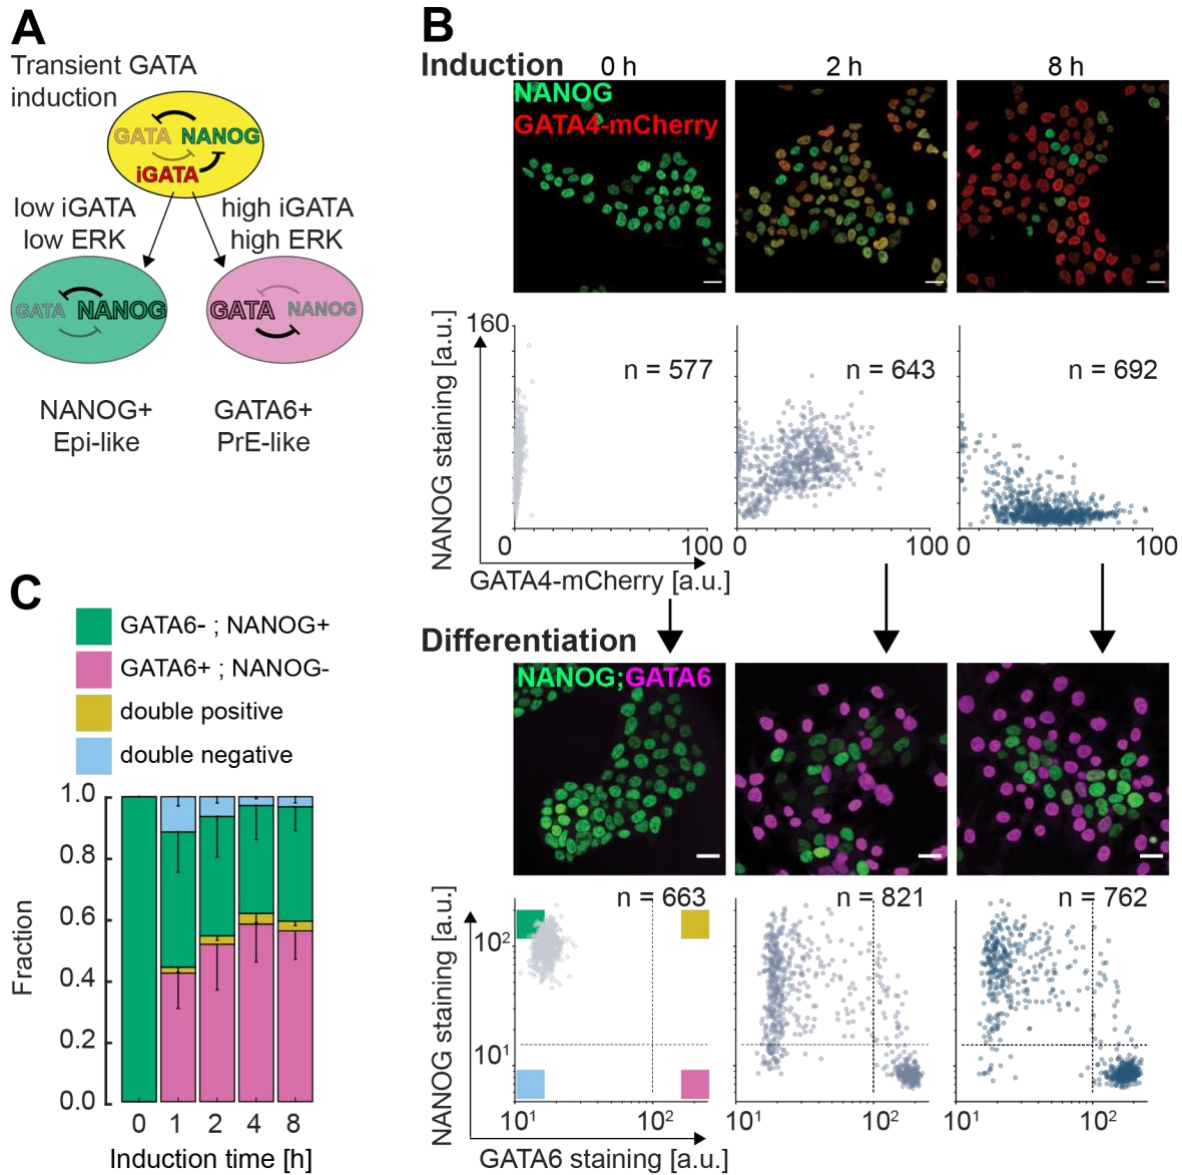

693

694 **Fig. 1: Proportions of differentiated cell types are independent from GATA4-mCherry**  
 695 **induction levels**

696 **A** Schematic representation of differentiation paradigm. From an ICM-like state (yellow)  
 697 generated by transient doxycycline-mediated expression of GATA factors, cells return to an  
 698 Epi-like state (green, left) or adopt a PrE-like identity (magenta, right) depending on GATA  
 699 levels and ERK activity. **B** Top rows: Immunostaining and quantitative analysis of  
 700 fluorescence in individual nuclei of NANOG (green) and GATA4-mCherry (red) expression  
 701 in inducible cell lines after indicated durations of doxycycline stimulation. Bottom rows:

702 Immunostaining and quantification of GATA6 and NANOG expression in cells treated with  
703 doxycycline for indicated periods of time and differentiated in N2B27 for 40 h. Cells without  
704 doxycycline induction have been continuously maintained in 2i medium. Dashed lines in  
705 scatter plots indicate thresholds to determine cell identities: Upper left quadrant: GATA6-;  
706 NANOG+ (G-,N+); lower right quadrant GATA6+; NANOG- (G+,N-); upper right quadrant  
707 double positive (DP); lower left quadrant double negative (DN). Scale bars, 20  $\mu$ m. **C**  
708 Summary of mean proportions from N = 4 independent experiments; fraction of G+,N- cells  
709 in magenta, G-,N+ in green, DP cells in yellow, and DN cells in blue. Error bars indicate 95%  
710 confidence intervals.  
711

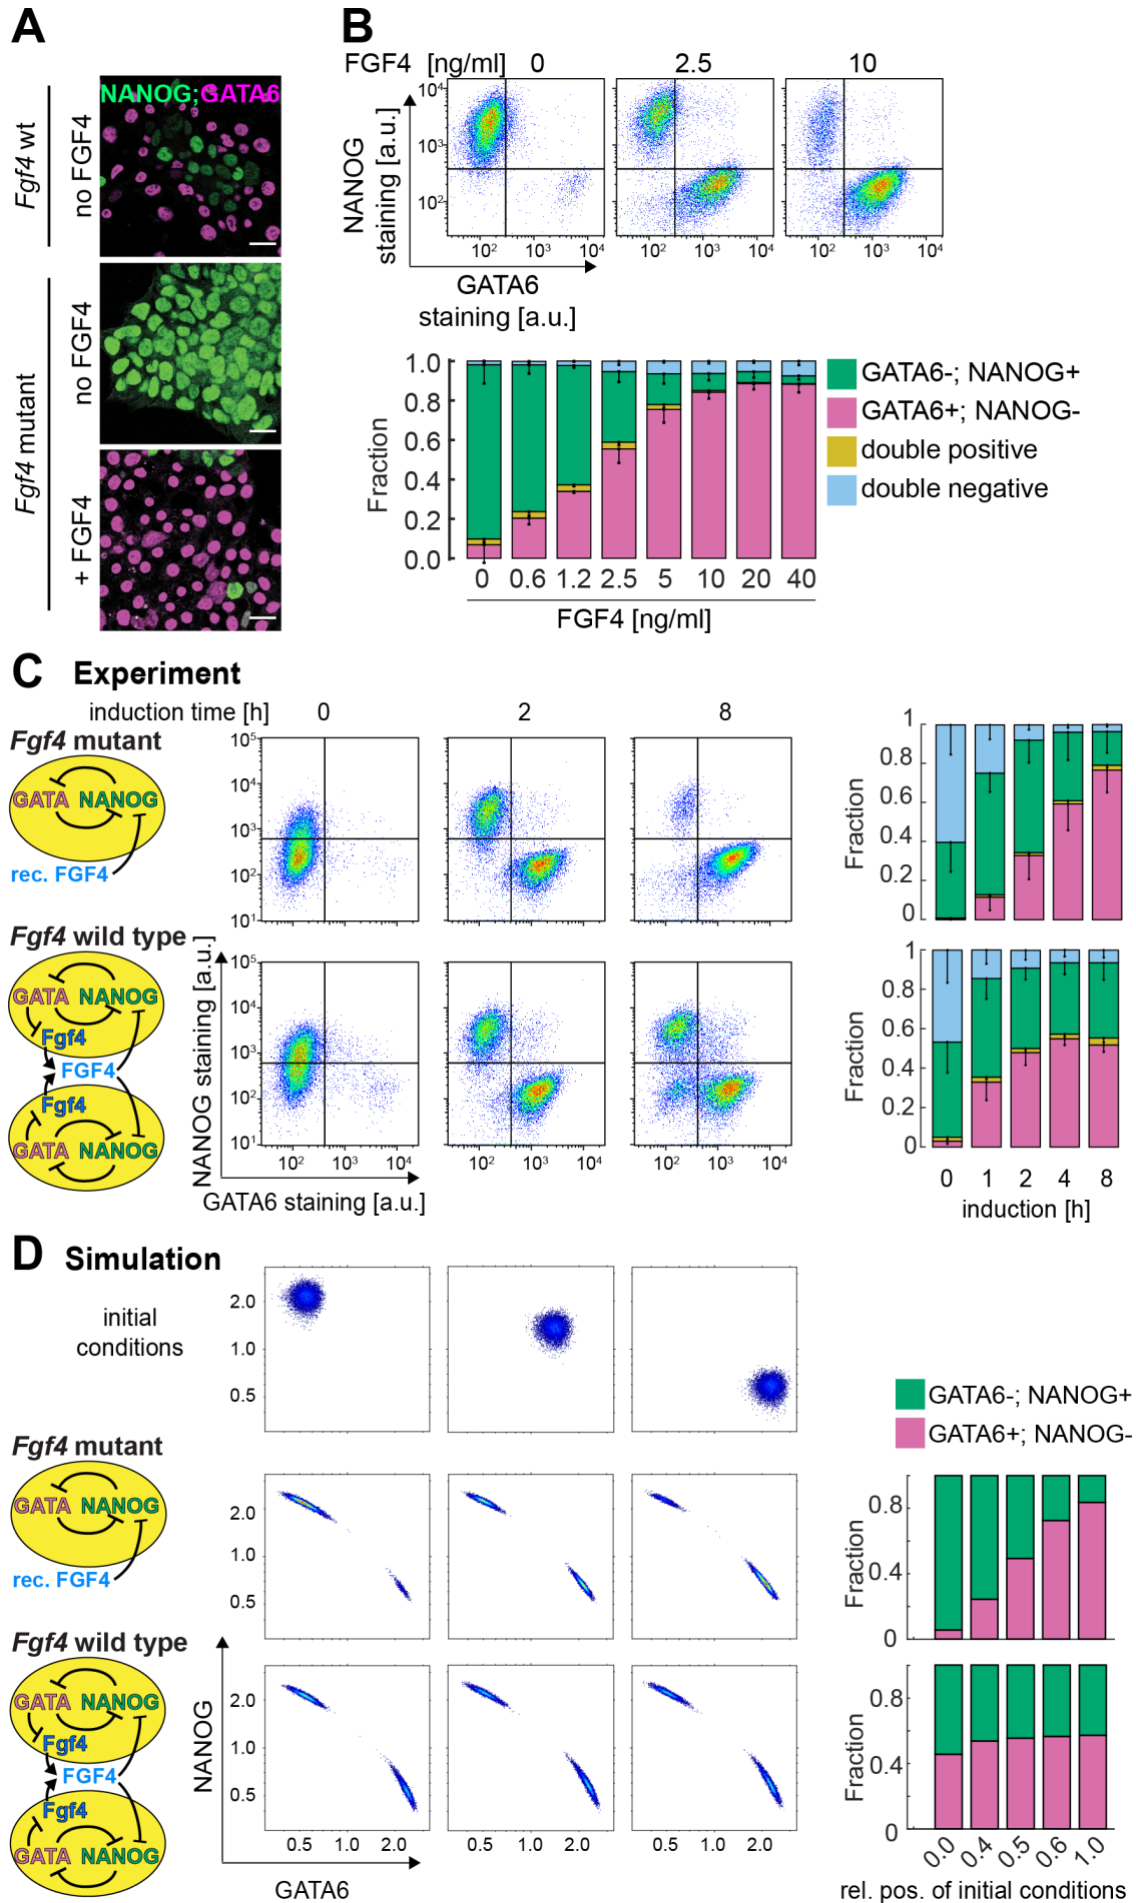

713 **Fig. 2: Cell-cell communication via FGF4 mediates cell fate proportioning**

714 **A** Immunostaining of *Fgf4* wild type (top) and *Fgf4* mutant (bottom) cells stained for GATA6  
715 (magenta) and NANOG (green) after 8 h of doxycycline induction followed by 40 h of  
716 differentiation in N2B27 medium only, or upon supplementation with 10 ng/ml FGF4 as  
717 indicated. Scale bars, 20  $\mu$ m. **B** Top: Flow cytometry of *Fgf4* mutant cells stained as in **A**  
718 following 8 h of doxycycline induction and differentiation in N2B27 supplemented with the  
719 indicated concentrations of FGF4. Lines indicate gates to assign cell identities. Bottom: Bar  
720 chart summarizing mean proportions aggregated from four independent experiments; fraction  
721 of GATA6+; NANOG- cells in magenta, GATA6-; NANOG+ in green, double positive cells  
722 in yellow, and double negative cells in blue. Error bars indicate 95% CI. **C** Left: Flow  
723 cytometry of *Fgf4* mutant (upper panels) or wild type cells (lower panels) stimulated with  
724 doxycycline for the indicated times and differentiated in N2B27 alone (wild type), or in  
725 N2B27 supplemented with 10 ng/ml FGF4 (mutant). GATA6 and NANOG expression were  
726 visualized by immunostaining. Lines indicate gates to assign cell identities. Right: Bar chart  
727 summarizing mean proportions aggregated from four independent experiments; Color code as  
728 in **B**, error bars indicate 95% CI. **D** Numerical comparison of single-cell- and population-  
729 based cell type proportioning mechanisms. Top row: Initial condition distributions used in the  
730 simulations for the two distinct models (rows below). Relative positions of the initial  
731 conditions are 0.0 (left), 0.5 (middle) and 1.0 (right). Middle row: Exemplary cell type  
732 proportions and respective quantifications (bar plots, right) for the single-cell case,  
733 supplemented with constant  $F_{ext}$ . Bottom row: Same as above, only for the population-based  
734 case. Model and parameters: Methods.

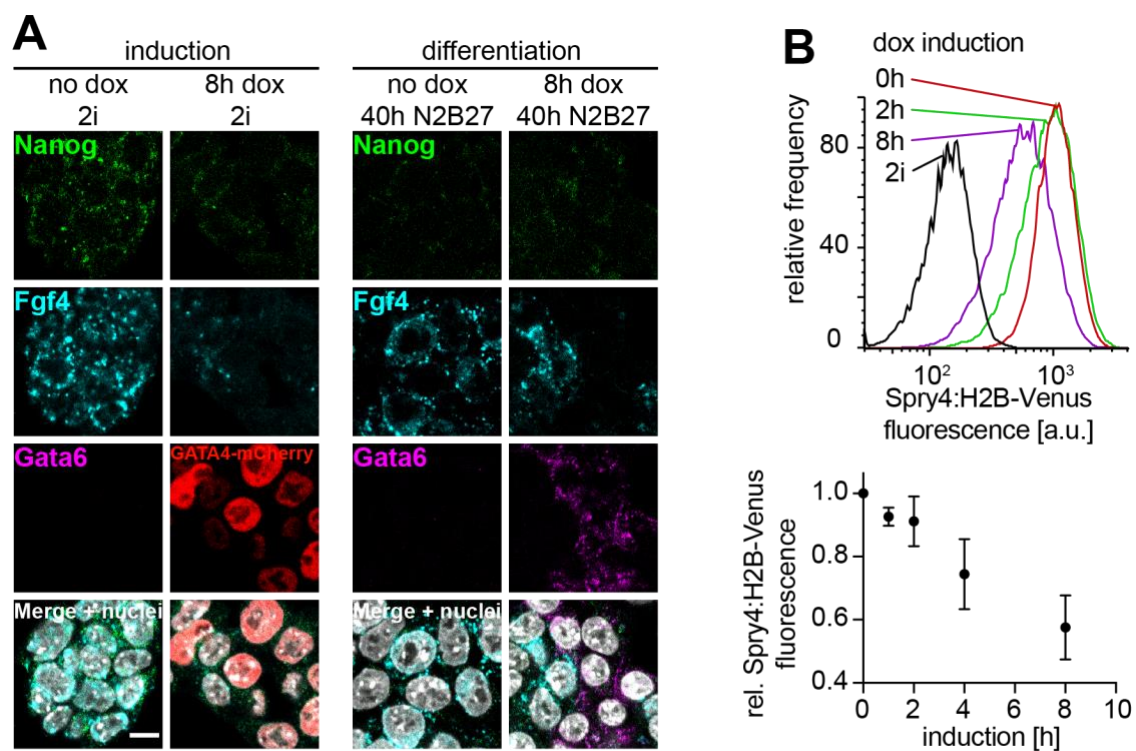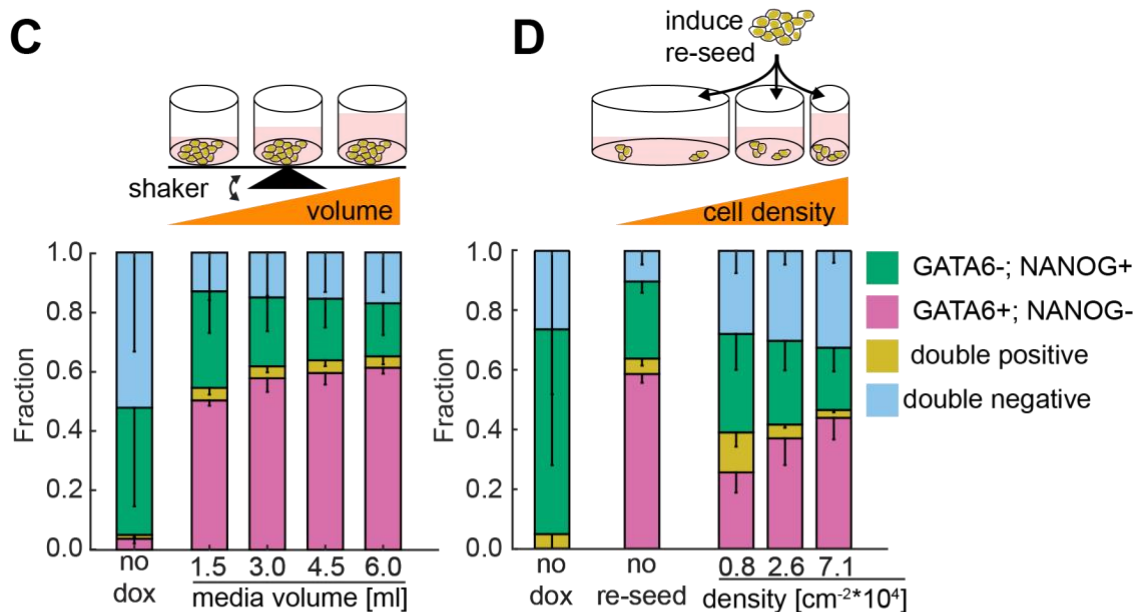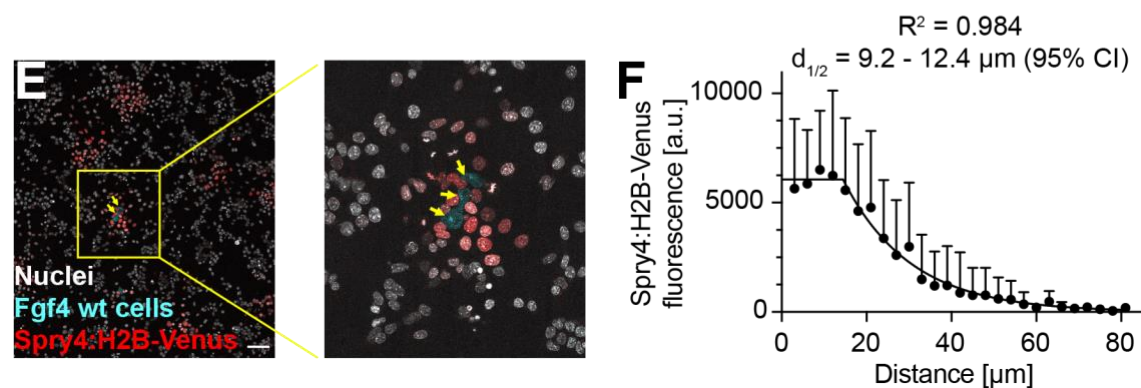

735

736

737 **Fig. 3: Fgf4 expression is repressed by GATA factors and acts locally.**

738 **A** Staining for Nanog (green), Fgf4 (cyan) and Gata6 (magenta) mRNA by in situ  
739 hybridization chain reaction before doxycycline induction (first column on the left), after 8 h of  
740 doxycycline induction (second column), and after 40 h in N2B27 without (third) or with  
741 previous doxycycline induction (fourth column). At the end of the induction period, GATA4-  
742 mCherry protein (red) instead of Gata6 mRNA is detected. Scale bar, 10  $\mu\text{m}$ . **B** Top: Flow  
743 cytometry histograms for expression of a *Spry4*<sup>H2B-Venus</sup> reporter integrated into GATA4-  
744 mCherry inducible lines 24 h after indicated durations of doxycycline induction. Black line  
745 indicates reporter expression in cells maintained in 2i medium. Bottom: Mean  $\pm$  SD of  
746 reporter expression from 4 independent experiments, normalized to fluorescence levels of  
747 cells transferred to N2B27 without doxycycline induction. **C** Top: Schematic representation  
748 of experimental setup to test effects of media volume on cell fate proportioning. Bottom:  
749 Quantitative analysis of cell identity analyzed by flow cytometry across N = 3 independent  
750 experiments, error bars indicate 95% CI. Fraction of GATA6<sup>+</sup>; NANOG<sup>-</sup> cells (G<sup>+</sup>,N<sup>-</sup>) in  
751 magenta, GATA6<sup>-</sup>; NANOG<sup>+</sup> (G<sup>-</sup>,N<sup>+</sup>) in green, double positive cells (DP) in yellow, double  
752 negative cells (DN) in blue. **D** Top: Schematic representation of experimental setup to test  
753 effects of cell density on fate proportioning. Bottom: Quantitative analysis of cell identity  
754 analyzed by flow cytometry across N = 4 independent experiments, error bars indicate 95%  
755 CI. Color code as in **C**. **E** Single labeled *Fgf4* wild-type cells (cyan, yellow arrowheads)  
756 seeded on a layer of *Fgf4*-mutant *Spry4*<sup>H2B-Venus</sup> transcriptional reporter cells. Nuclei are  
757 labelled by siR-Hoechst (white), H2B-Venus in red. Scale bar, 100  $\mu\text{m}$ . **F** Quantitative  
758 analysis of FGF4 signaling range. Relative H2B-Venus fluorescence intensities and distance  
759 from the center of *Fgf4* wild type cells were measured for individual nuclei of *Spry4*<sup>H2B-Venus</sup>  
760 reporter cells from nine independent signaling centers. Shown are mean  $\pm$  SD of fluorescence  
761 intensities in distance bins of 3  $\mu\text{m}$  width. The fluorescence decay length was estimated by  
762 fitting a plateau followed by one-phase exponential decay to the data (black line).



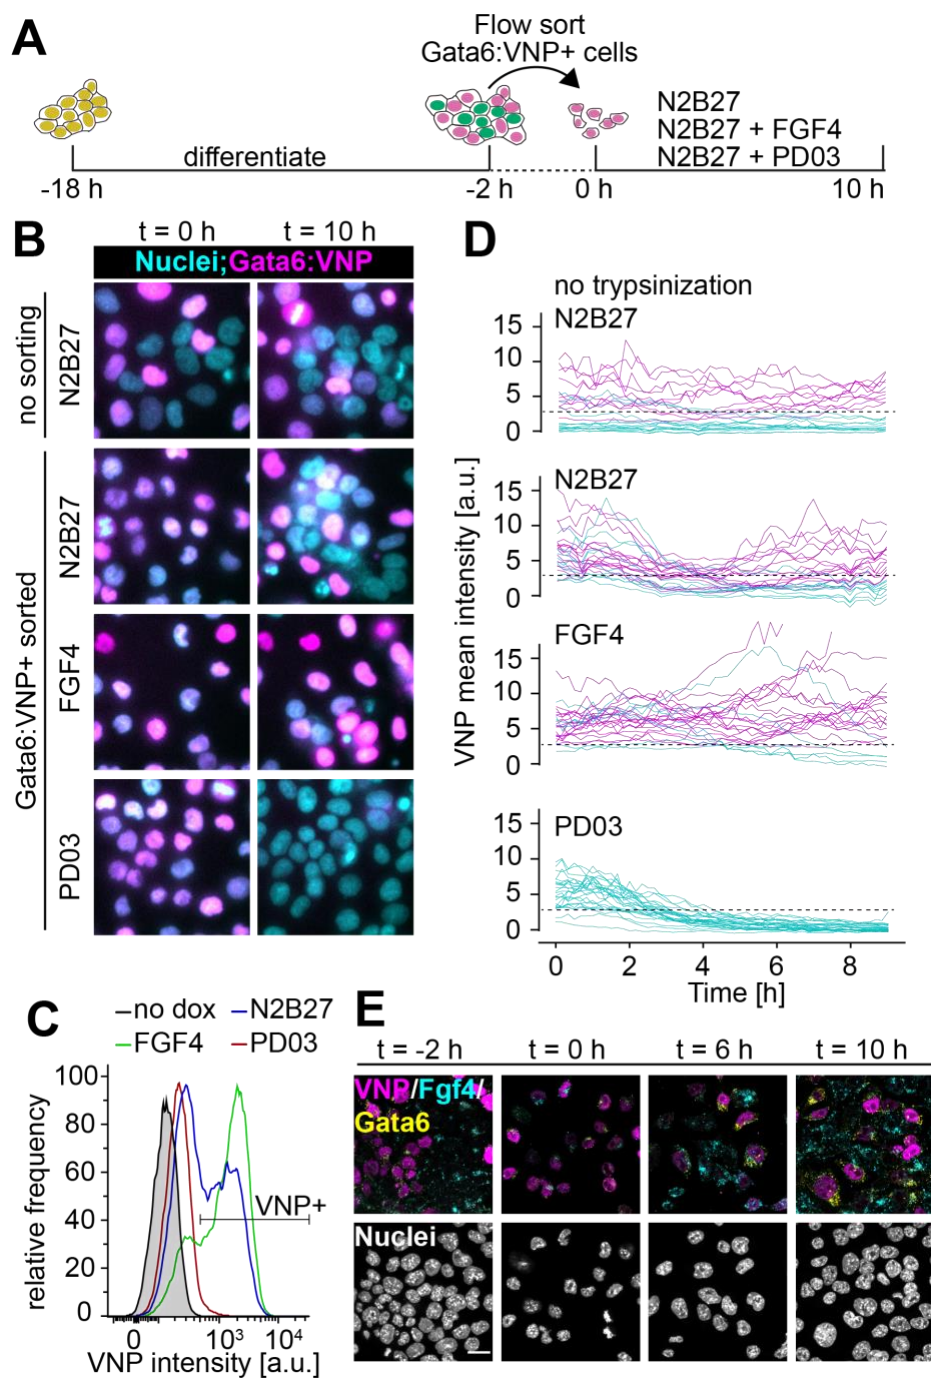

763

764 **Fig. 4: Heterogeneous cell identities are re-established by cell-cell communication**

765 **A** Schematic representation of experimental setup. **B** Representative images of non-  
 766 trypsinized control (upper row) and cells immediately after sorting for Gata6:VNP expression  
 767 (left), and after 10 h of culturing in N2B27 medium with the indicated supplements (right). **C**  
 768 Flow cytometry to detect VNP expression in cells that had been sorted for VNP-expression,  
 769 followed by 10 h of culture in the indicated media. **D** Live-cell traces of VNP expression in  
 770 individual cells from a non-trypsinized colony (upper panel), or cells sorted for VNP-

771 expression upon culture in the indicated media. Traces are color coded according to  
772 expression levels at the end of the experiment. Dashed line indicates the threshold to separate  
773 putative VNP-positive cells (magenta) from VNP-negative cells (cyan). **E** Staining for Fgf4  
774 (cyan) and Gata6 (yellow) mRNA in Gata6:VNP-reporter cells before sorting (left) and at 2 h,  
775 6 h and 10 h after flow sorting of VNP-positive cells. VNP fluorescence in magenta. Scale  
776 bar, 20  $\mu$ m.  
777

778 **Supplementary Figures**

779

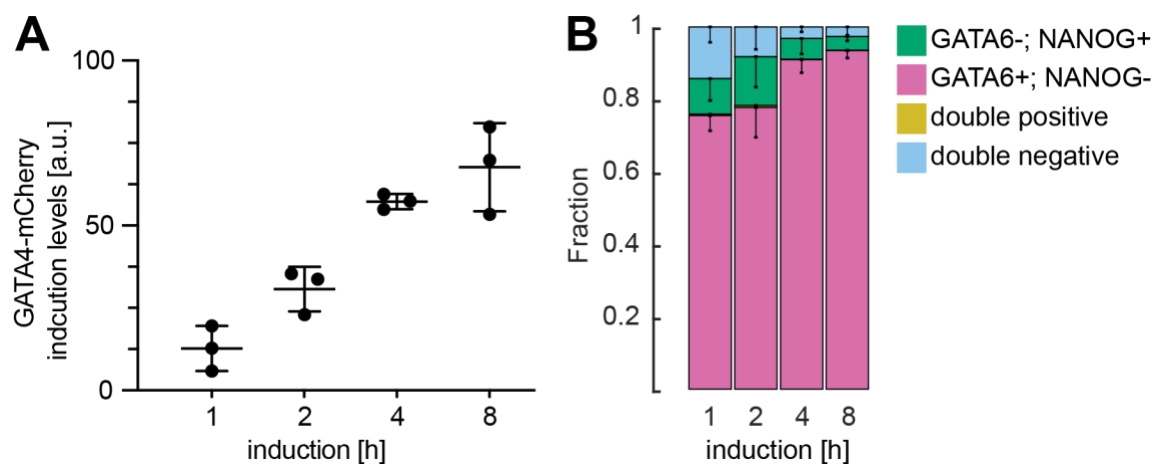

780

781 **Supplementary Fig. S1**

782 **A** GATA4-mCherry expression levels for different durations of doxycycline induction  
783 measured by flow cytometry. Individual data points show normalized mean fluorescence  
784 intensities from at least 20,000 cells in an individual experiment, bars indicate mean  $\pm$  SD  
785 across independent experiments. mCherry fluorescence in uninduced cells cultured in 2i +  
786 LIF medium was set to one. **B** Proportions of cell fates upon indicated durations of  
787 doxycycline induction followed by 40 h of differentiation in N2B27 medium supplemented  
788 with 10 ng/ml FGF4. Cell identities were determined by immunostaining and quantitative  
789 immunofluorescence, data is pooled from four independent experiments, error bars indicate  
790 95% CI.

791

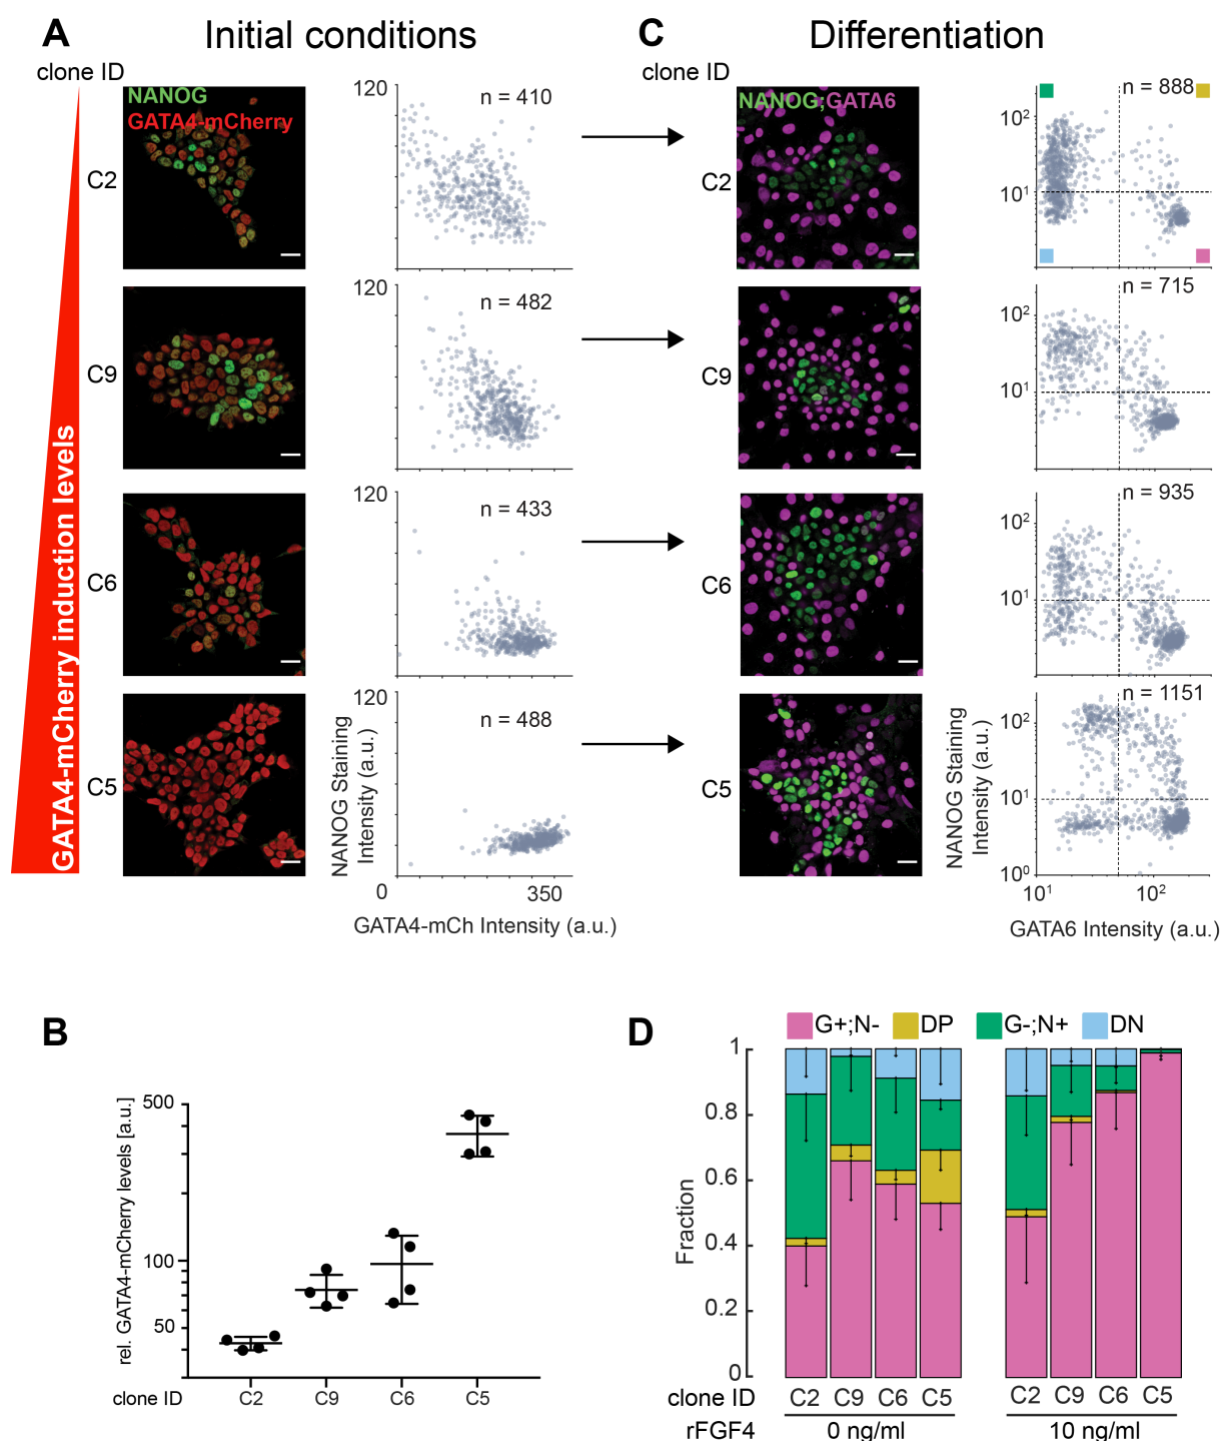

792

793 **Supplementary Fig. S2**

794 **A** Immunostaining (left) and quantitative analysis of fluorescence in individual nuclei (right)

795 of NANOG (green) and GATA4-mCherry (red) expression in four independent clonal

796 inducible cell lines after 8 h of doxycycline stimulation. Clones are ordered by GATA4-

797 mCherry expression strength; one out of 4 independent experiments shown. **B** GATA4-

798 mCherry induction levels in the clones shown in **A** after 8 hours of doxycycline treatment

799 measured by flow cytometry. Mean mCherry mean fluorescence intensity for every clone was  
800 normalized to that of the non-induced control in each experiment to allow for comparison.  
801 Plot shows individual data points and mean  $\pm$  SD from four independent experiments.  
802 **C** Immunostaining (left) and single cell quantification of GATA6 and NANOG expression in  
803 cells from independent clonal lines treated with doxycycline for indicated periods of time and  
804 differentiated in N2B27 for 40 h. Dashed lines indicate thresholds to determine cell identities:  
805 Upper left quadrant: GATA6<sup>-</sup>; NANOG<sup>+</sup> (G<sup>-</sup>,N<sup>+</sup>); lower right quadrant GATA6<sup>+</sup>; NANOG<sup>-</sup>  
806 (G<sup>+</sup>,N<sup>-</sup>); upper right quadrant double positive (DP); lower left quadrant double negative  
807 (DN). Clones are ordered by GATA4-mCherry induction strength as in **A**. Scale bars in **A**, **C**,  
808 20  $\mu$ m. **D** Quantification of results from **C** across four independent experiments for  
809 differentiation in N2B27 only (left) or in N2B27 supplemented with 10 ng/ml FGF4 (right).  
810 Fraction of G<sup>+</sup>,N<sup>-</sup> in magenta, G<sup>-</sup>,N<sup>+</sup> in green, DP cells in yellow, and DN cells in blue. Error  
811 bars indicate 95% CI.  
812

813

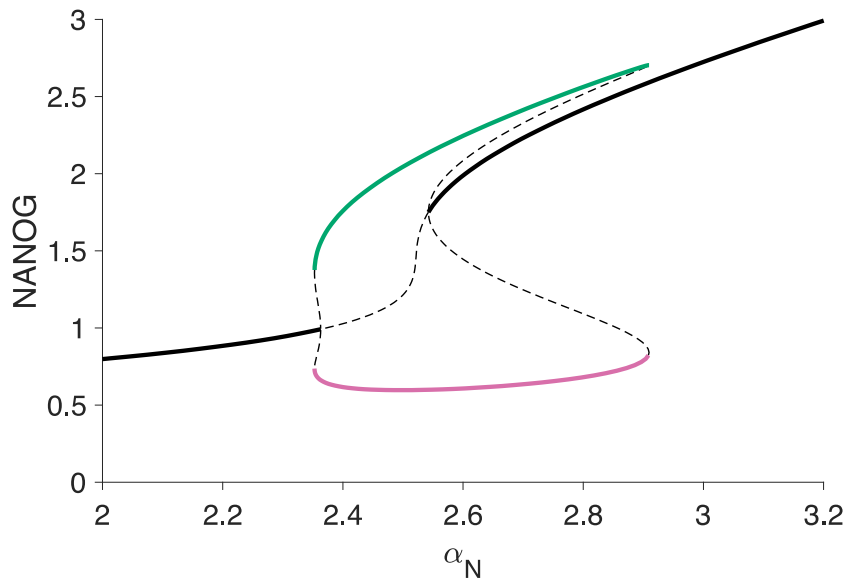

814

815 **Supplementary Fig. S3**

816 Bifurcation diagram showing the stable IHSS solution for a two-cell coupled system in  
817 dependence of the production rate constant of NANOG. Solid lines: stable branches of the  
818 IHSS solution; dashed lines: unstable solutions. Black: HSS; green and magenta: GATA6-  
819 /NANOG+ and GATA6+/NANOG- conjugate branches of the IHSS solution.

820

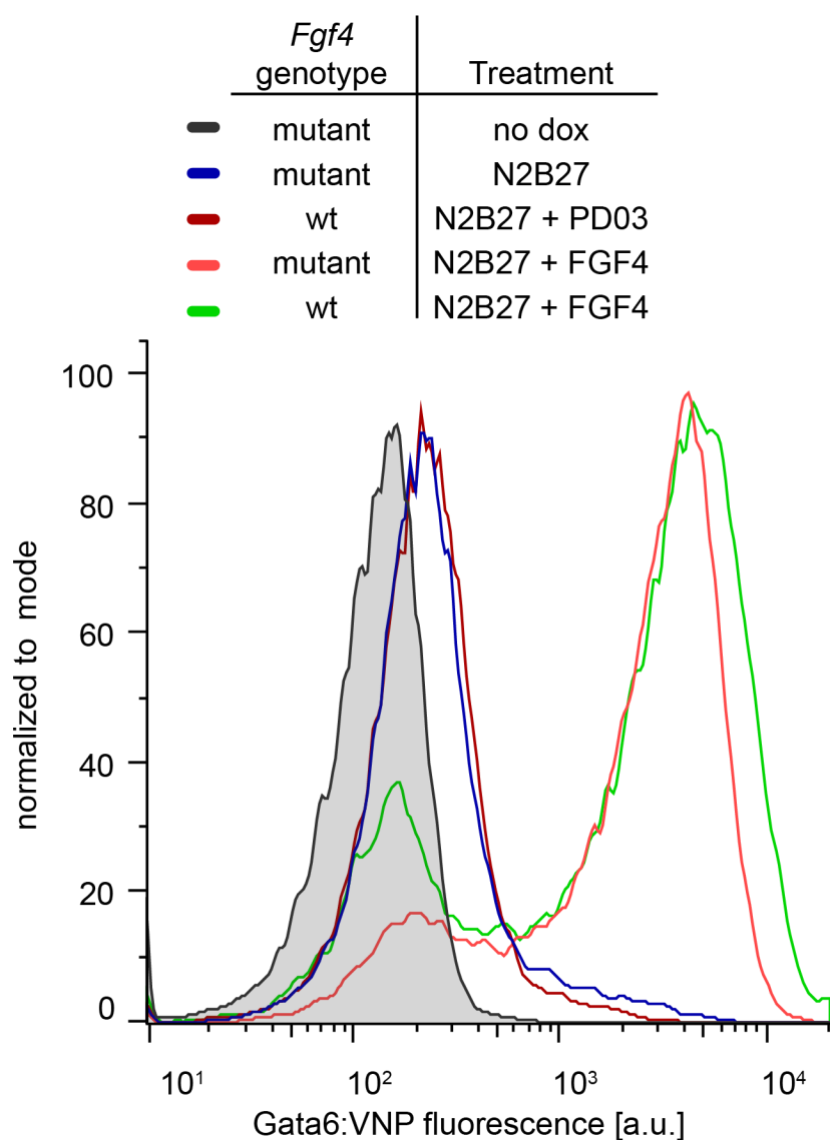

828 **Supplementary Movie legends**

829

830 **Supplementary Movie S1 – S3**

831 Time-lapse imaging of Gata6:VNP reporter cells flow sorted for VNP-expression 16 h after  
832 the end of a doxycycline pulse and cultured in defined N2B27 medium alone (Movie S1), or  
833 cultured in N2B27 supplemented with 10 ng/ml FGF4 (Movie S2), or cultured in N2B27  
834 supplemented with 1  $\mu$ M of the MEK inhibitor PD03 (Movie S3).

835

836 **Supplementary Movie S4**

837 Time-lapse imaging of a colony of Gata6:VNP reporter cells starting 16 h after the end of a  
838 doxycycline pulse. Medium has been switched to N2B27 at the beginning of the recording.
